# Supplementary material
Source: HighWire-hosted journal article supplement (https://bmjopen.bmj.com/content/7/2/e014444)
Supplement: inline-supplementary-material-1 [file inline-supplementary-material-1.pdf]

---

## Supplementary Materials

---

### Tables

---

|                                                                                                                                                                             |    |
|-----------------------------------------------------------------------------------------------------------------------------------------------------------------------------|----|
| Table 1. Search terms for Diabetic Retinopathy .....                                                                                                                        | 7  |
| Table 2. Categorization of Read codes for Diabetes Mellitus .....                                                                                                           | 7  |
| Table 3. Read codes for Diabetes Mellitus .....                                                                                                                             | 8  |
| Table 4. Read codes for Diabetic Retinopathy diagnosis .....                                                                                                                | 19 |
| <a href="#">Table 5. Read codes for Ethnicity (Table reproduced from</a><br><a href="http://www.clininf.eu/ethnicity.html">http://www.clininf.eu/ethnicity.html</a> ) ..... | 22 |

## Figures

---

|                                                                                                                |    |
|----------------------------------------------------------------------------------------------------------------|----|
| Figure 1. Derivation of study population from the CPRD.....                                                    | 3  |
| Figure 2. Results from Flowchart 1: Initial Sort and Classification.....                                       | 4  |
| Figure 3. Results from Flowchart 2: Improving classification of type 1 diabetes .....                          | 5  |
| Figure 4. Results from Flowchart 3: Improving classification of type 2 diabetes .....                          | 6  |
| Figure 1. Classification of Ethnicity in the CPRD<br>(From Mathur et al. Journal of Public Health, 2013) ..... | 25 |

## a. Population Flow Diagram

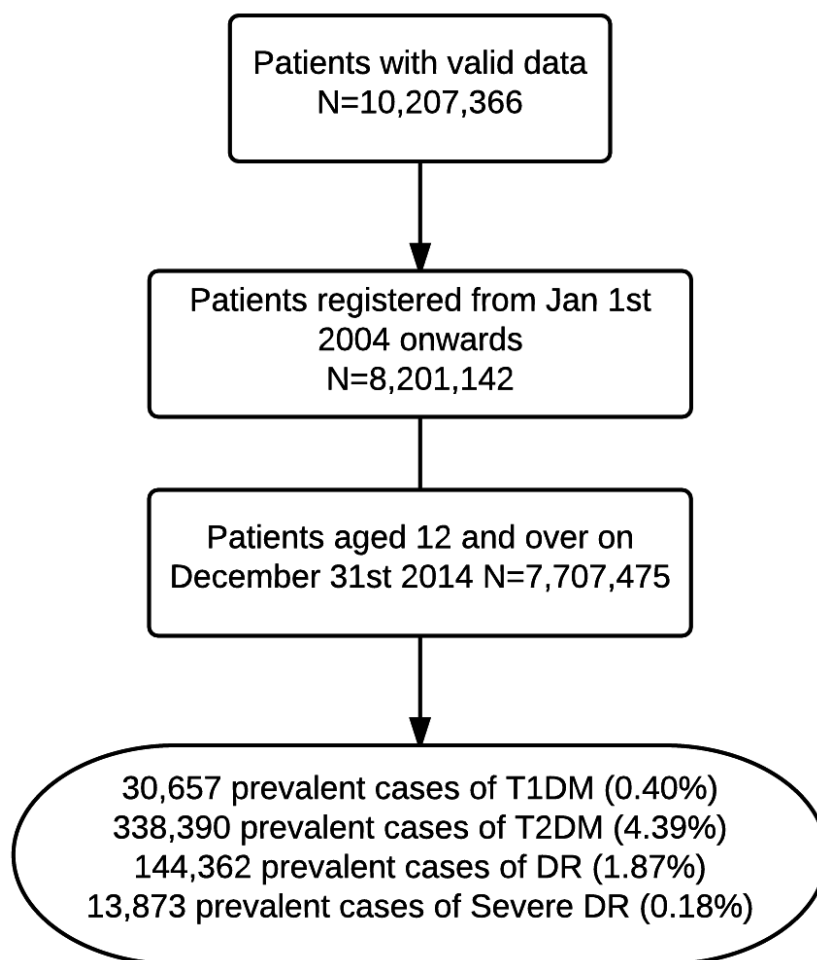

Figure 2. Derivation of study population from the CPRD

## b. Results of the diabetes adjudication algorithms

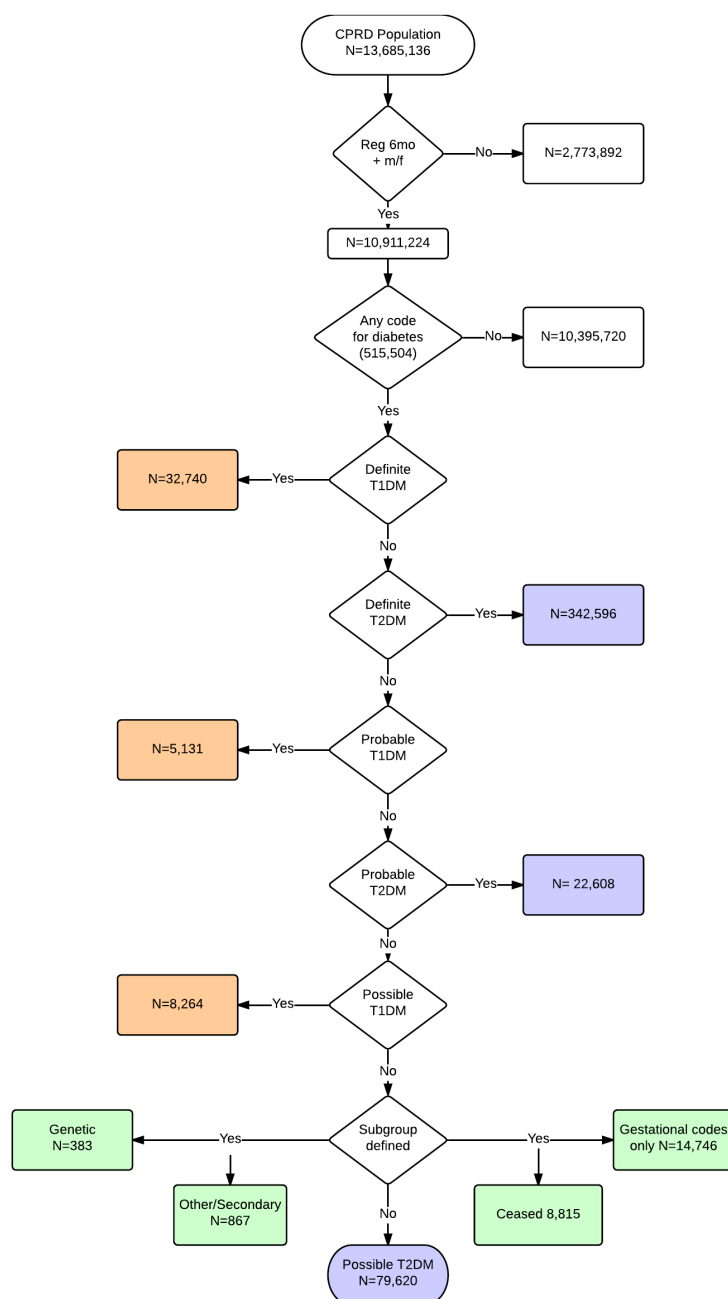

Figure 3. Results from Flowchart 1: Initial Sort and Classification

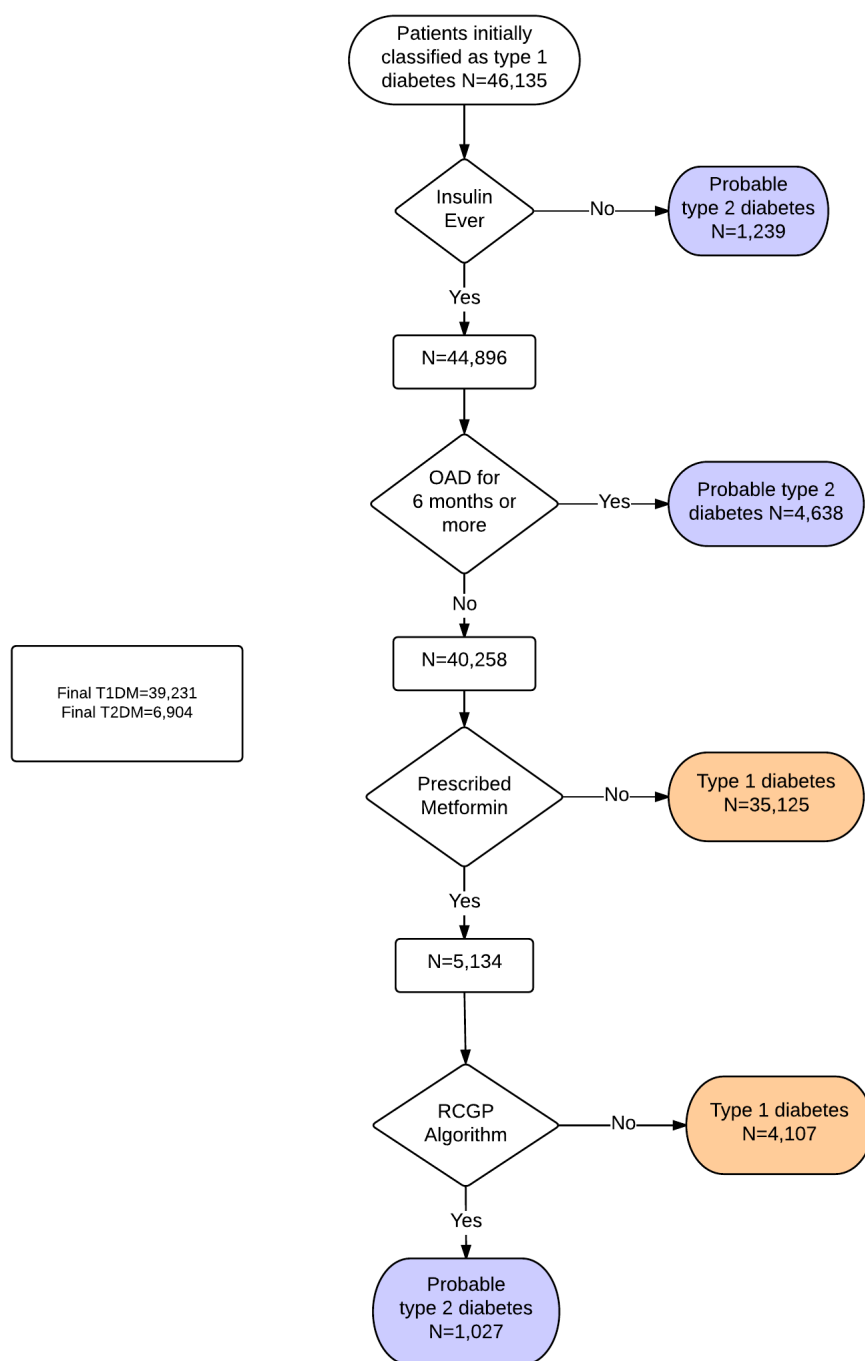

Figure 4. Results from Flowchart 2: Improving classification of type 1 diabetes

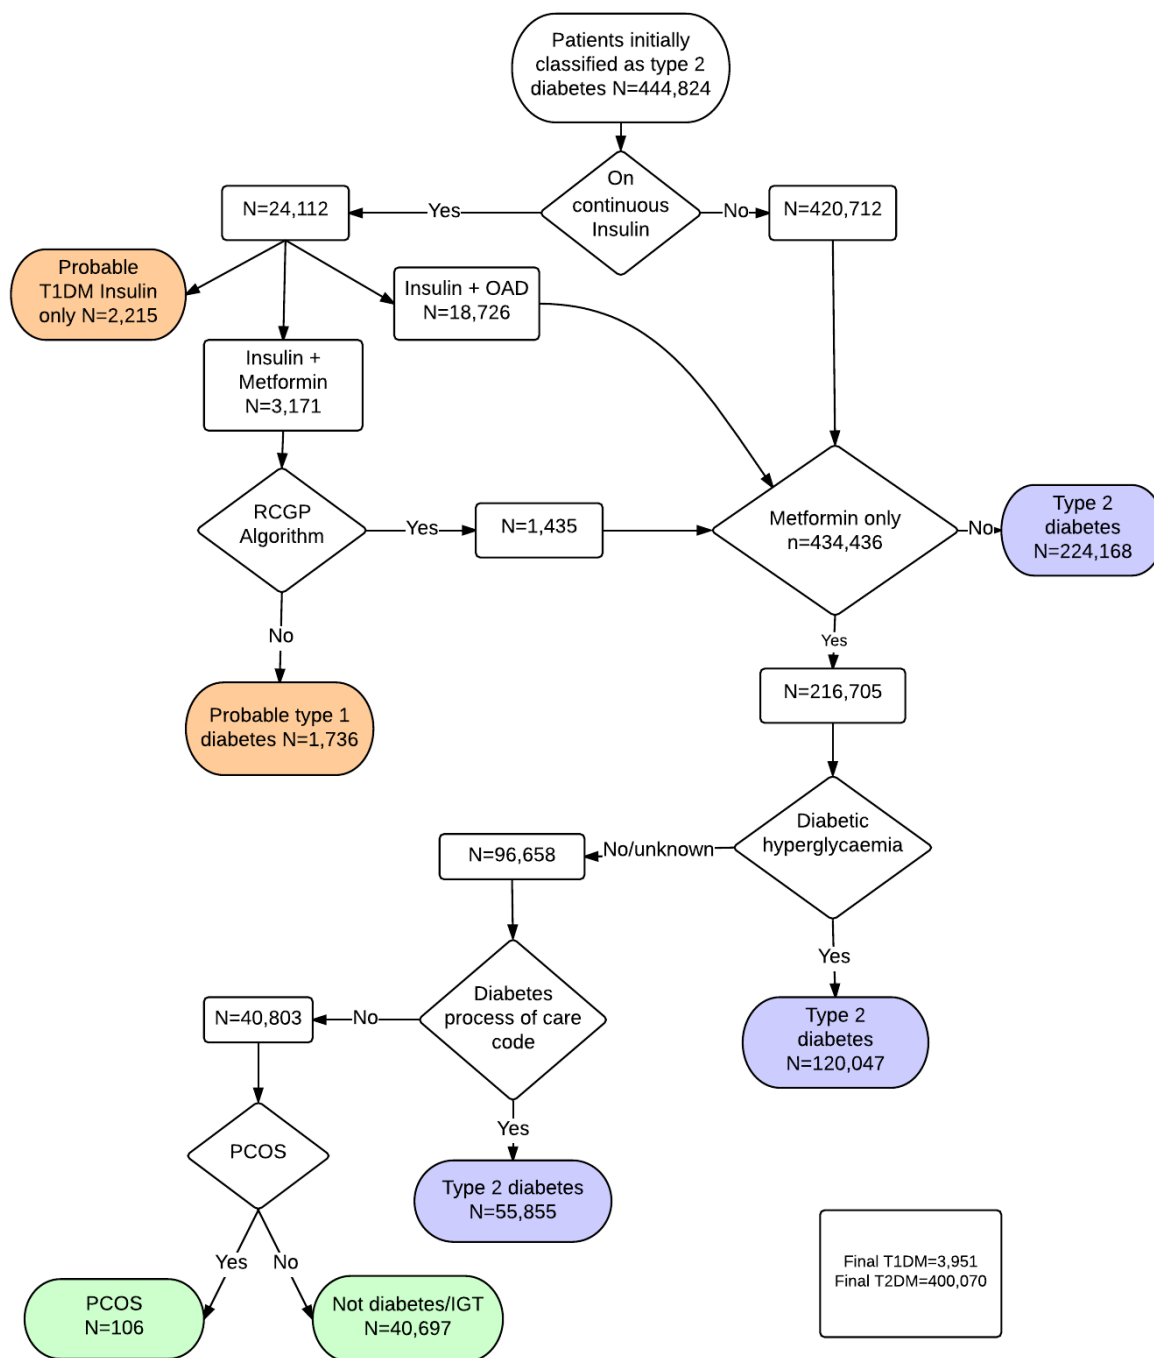

Figure 5. Results from Flowchart 3: Improving classification of type 2 diabetes

## c. Codelists

**Table 1. Search terms for Diabetic Retinopathy**

|                                                                                                                                                                                                                                                            |
|------------------------------------------------------------------------------------------------------------------------------------------------------------------------------------------------------------------------------------------------------------|
| Keywords for identifying diabetic retinopathy in the CPRD                                                                                                                                                                                                  |
| *RETINAL* and *SCR* or *ARTERIES* or *EXUDATE* or *MICROANEURYSMS* or *PHOTOGRAPHY* or *ABNORMALITY*                                                                                                                                                       |
| *O/E* and *RETINA* or *FUNDUS* or *PHOTOCOAGULATION* or *MACULAR* or *VITREOUS*                                                                                                                                                                            |
| *LASER" and *RETINA*                                                                                                                                                                                                                                       |
| *RETINOPATHY* or *FUNDOSCOPY* or *MACULOPATHY* or *RED REFLEX* or *SEEN BY OP* or *RETINAL SCR* or *RETINOSCOPY* or *SLIT LAMP* or *DIABETIC EYE* or *EYE FUNDUS* or *EXAMINATION OF RETINA* or *RETINA AND OTHER PARTS OF EYE OPERATIONS* or *VITRECTOMY* |
| Keywords excluded (to remove obstetric terms related to "fundus")                                                                                                                                                                                          |
| *TERM SIZE* or *WEEK SIZE* or *OBSTETRIC*                                                                                                                                                                                                                  |

**Table 2. Categorization of Read codes for Diabetes Mellitus**

|          | Type 1 Diabetes                                                                              | Type 2 Diabetes                                                                                   | Other                                                                                                                                                 |
|----------|----------------------------------------------------------------------------------------------|---------------------------------------------------------------------------------------------------|-------------------------------------------------------------------------------------------------------------------------------------------------------|
| Definite | Type 1 DM: C10E<br>Not contradicted/ceased/superseded                                        | Type 2 DM: C10F<br>Not<br>contradicted/ceased/superseded                                          | Gestational L180<br>Genetic C10c-C10D<br>Other/Secondary<br>C10G-J, L-N, C11y0<br>Insulin resistance:<br>C10K, C1098, C10F8<br>Ceased: 21263,<br>212H |
| Probable | IDDM: C108<br>Adult onset: C1073<br>Gestational: L1805<br>Not contradicted/ceased/superseded | NIDDM: C109<br>Gestational: L1806<br>Gestational: L180X<br>Not<br>contradicted/ceased/superseded  |                                                                                                                                                       |
| Possible | Diabetes mellitus, adult onset:<br>C10z1 C10y0 C110<br>Not contradicted/ceased/superseded    | Diabetes mellitus, adult onset:<br>C10%, C112 (z), L180x<br>Not<br>contradicted/ceased/superseded |                                                                                                                                                       |

Table 3. Read codes for Diabetes Mellitus

| medcode | readcode | readterm                                                     | category          |
|---------|----------|--------------------------------------------------------------|-------------------|
| 28622   | 2126300  | Diabetes resolved                                            | Diabetes ceased   |
| 18766   | 212H.00  | Diabetes resolved                                            | Diabetes ceased   |
| 711     | C10..00  | Diabetes mellitus                                            | Vague codes       |
| 38986   | C100.00  | Diabetes mellitus with no mention of complication            | Vague codes       |
| 24490   | C100000  | Diabetes mellitus, juvenile type, no mention of complication | Possible T1 codes |
| 1038    | C100011  | Insulin dependent diabetes mellitus                          | Possible T1 codes |
| 14803   | C100100  | Diabetes mellitus, adult onset, no mention of complication   | Possible T2 codes |
| 14889   | C100111  | Maturity onset diabetes                                      | Possible T2 codes |
| 506     | C100112  | Non-insulin dependent diabetes mellitus                      | Possible T2 codes |
| 50972   | C100z00  | Diabetes mellitus NOS with no mention of complication        | Vague codes       |
| 1682    | C101.00  | Diabetes mellitus with ketoacidosis                          | Vague codes       |
| 53200   | C101000  | Diabetes mellitus, juvenile type, with ketoacidosis          | Possible T1 codes |
| 54856   | C101100  | Diabetes mellitus, adult onset, with ketoacidosis            | Vague codes       |
| 38617   | C101y00  | Other specified diabetes mellitus with ketoacidosis          | Vague codes       |
| 42505   | C101z00  | Diabetes mellitus NOS with ketoacidosis                      | Vague codes       |
| 21482   | C102.00  | Diabetes mellitus with hyperosmolar coma                     | Vague codes       |
| 40023   | C102000  | Diabetes mellitus, juvenile type, with hyperosmolar coma     | Possible T1 codes |
| 43139   | C102100  | Diabetes mellitus, adult onset, with hyperosmolar coma       | Possible T2 codes |
| 72345   | C102z00  | Diabetes mellitus NOS with hyperosmolar coma                 | Vague codes       |
| 15690   | C103.00  | Diabetes mellitus with ketoacidotic coma                     | Vague codes       |
| 42567   | C103000  | Diabetes mellitus, juvenile type, with ketoacidotic coma     | Possible T1 codes |
| 68843   | C103100  | Diabetes mellitus, adult onset, with ketoacidotic coma       | Possible T2 codes |
| 59288   | C103y00  | Other specified diabetes mellitus with coma                  | Vague codes       |
| 65062   | C103z00  | Diabetes mellitus NOS with ketoacidotic coma                 | Vague codes       |
| 16502   | C104.00  | Diabetes mellitus with renal manifestation                   | Vague codes       |
| 2475    | C104.11  | Diabetic nephropathy                                         | Vague codes       |
| 93922   | C104000  | Diabetes mellitus, juvenile type, with renal manifestation   | Possible T1 codes |
| 35105   | C104100  | Diabetes mellitus, adult onset, with renal manifestation     | Possible T2 codes |
| 13279   | C104y00  | Other specified diabetes mellitus with renal complications   | Vague codes       |



| medcode | readcode | readterm                                                     | category          |
|---------|----------|--------------------------------------------------------------|-------------------|
| 35107   | C104z00  | Diabetes mellitis with nephropathy NOS                       | Vague codes       |
| 33254   | C105.00  | Diabetes mellitus with ophthalmic manifestation              | Vague codes       |
| 69748   | C105000  | Diabetes mellitus, juvenile type, + ophthalmic manifestation | Possible T1 codes |
| 41389   | C105100  | Diabetes mellitus, adult onset, + ophthalmic manifestation   | Possible T2 codes |
| 47377   | C105y00  | Other specified diabetes mellitus with ophthalmic complicatn | Vague codes       |
| 34283   | C105z00  | Diabetes mellitus NOS with ophthalmic manifestation          | Vague codes       |
| 16230   | C106.00  | Diabetes mellitus with neurological manifestation            | Vague codes       |
| 59903   | C106.11  | Diabetic amyotrophy                                          | Vague codes       |
| 7795    | C106.12  | Diabetes mellitus with neuropathy                            | Vague codes       |
| 16491   | C106.13  | Diabetes mellitus with polyneuropathy                        | Vague codes       |
| 67853   | C106000  | Diabetes mellitus, juvenile, + neurological manifestation    | Possible T1 codes |
| 39317   | C106100  | Diabetes mellitus, adult onset, + neurological manifestation | Possible T2 codes |
| 61523   | C106y00  | Other specified diabetes mellitus with neurological comps    | Vague codes       |
| 22573   | C106z00  | Diabetes mellitus NOS with neurological manifestation        | Vague codes       |
| 35399   | C107.00  | Diabetes mellitus with peripheral circulatory disorder       | Vague codes       |
| 32403   | C107.11  | Diabetes mellitus with gangrene                              | Vague codes       |
| 32556   | C107.12  | Diabetes with gangrene                                       | Vague codes       |
| 70448   | C107000  | Diabetes mellitus, juvenile +peripheral circulatory disorder | Possible T1 codes |
| 63357   | C107100  | Diabetes mellitus, adult, + peripheral circulatory disorder  | Possible T2 codes |
| 33807   | C107200  | Diabetes mellitus, adult with gangrene                       | Possible T2 codes |
| 69124   | C107300  | IDDM with peripheral circulatory disorder                    | Probable T1 codes |
| 56803   | C107400  | NIDDM with peripheral circulatory disorder                   | Probable T2 codes |
| 65025   | C107z00  | Diabetes mellitus NOS with peripheral circulatory disorder   | Vague codes       |
| 1647    | C108.00  | Insulin dependent diabetes mellitus                          | Probable T1 codes |
| 18505   | C108.11  | IDDM-Insulin dependent diabetes mellitus                     | Probable T1 codes |

| medcode | readcode | readterm                                                     | category          |
|---------|----------|--------------------------------------------------------------|-------------------|
| 17858   | C108.12  | Type 1 diabetes mellitus                                     | Probable T1 codes |
| 24423   | C108.13  | Type I diabetes mellitus                                     | Probable T1 codes |
| 46963   | C108000  | Insulin-dependent diabetes mellitus with renal complications | Probable T1 codes |
| 61344   | C108011  | Type I diabetes mellitus with renal complications            | Probable T1 codes |
| 21983   | C108012  | Type 1 diabetes mellitus with renal complications            | Probable T1 codes |
| 49276   | C108100  | Insulin-dependent diabetes mellitus with ophthalmic comps    | Probable T1 codes |
| 52283   | C108200  | Insulin-dependent diabetes mellitus with neurological comps  | Probable T1 codes |
| 49146   | C108211  | Type I diabetes mellitus with neurological complications     | Probable T1 codes |
| 61829   | C108212  | Type 1 diabetes mellitus with neurological complications     | Probable T1 codes |
| 52104   | C108300  | Insulin dependent diabetes mellitus with multiple complicatn | Probable T1 codes |
| 26855   | C108400  | Unstable insulin dependant diabetes mellitus                 | Probable T1 codes |
| 60107   | C108411  | Unstable type I diabetes mellitus                            | Probable T1 codes |
| 97474   | C108412  | Unstable type 1 diabetes mellitus                            | Probable T1 codes |
| 44443   | C108500  | Insulin dependent diabetes mellitus with ulcer               | Probable T1 codes |
| 51957   | C108511  | Type I diabetes mellitus with ulcer                          | Probable T1 codes |
| 68390   | C108512  | Type 1 diabetes mellitus with ulcer                          | Probable T1 codes |
| 60499   | C108600  | Insulin dependent diabetes mellitus with gangrene            | Probable T1 codes |
| 6509    | C108700  | Insulin dependent diabetes mellitus with retinopathy         | Probable T1 codes |
| 38161   | C108711  | Type I diabetes mellitus with retinopathy                    | Probable T1 codes |
| 41049   | C108712  | Type 1 diabetes mellitus with retinopathy                    | Probable T1 codes |
| 6791    | C108800  | Insulin dependant diabetes mellitus - poor control           | Probable T1 codes |
| 46850   | C108811  | Type I diabetes mellitus - poor control                      | Probable T1 codes |
| 45914   | C108812  | Type 1 diabetes mellitus - poor control                      | Probable T1 codes |
| 31310   | C108900  | Insulin dependant diabetes maturity onset                    | Probable T1 codes |
| 63017   | C108911  | Type I diabetes mellitus maturity onset                      | Probable T1 codes |
| 97446   | C108912  | Type 1 diabetes mellitus maturity onset                      | Probable T1 codes |
| 56448   | C108A00  | Insulin-dependent diabetes without complication              | Probable T1 codes |
| 95992   | C108A11  | Type I diabetes mellitus without complication                | Probable T1 codes |

| medcode | readcode | readterm                                                    | category          |
|---------|----------|-------------------------------------------------------------|-------------------|
| 24694   | C108B00  | Insulin dependent diabetes mellitus with mononeuropathy     | Probable T1 codes |
| 99231   | C108B11  | Type I diabetes mellitus with mononeuropathy                | Probable T1 codes |
| 41716   | C108C00  | Insulin dependent diabetes mellitus with polyneuropathy     | Probable T1 codes |
| 57621   | C108D00  | Insulin dependent diabetes mellitus with nephropathy        | Probable T1 codes |
| 66872   | C108D11  | Type I diabetes mellitus with nephropathy                   | Probable T1 codes |
| 44440   | C108E00  | Insulin dependent diabetes mellitus with hypoglycaemic coma | Probable T1 codes |
| 42729   | C108E11  | Type I diabetes mellitus with hypoglycaemic coma            | Probable T1 codes |
| 70766   | C108E12  | Type 1 diabetes mellitus with hypoglycaemic coma            | Probable T1 codes |
| 44260   | C108F00  | Insulin dependent diabetes mellitus with diabetic cataract  | Probable T1 codes |
| 17545   | C108F11  | Type I diabetes mellitus with diabetic cataract             | Probable T1 codes |
| 64446   | C108G00  | Insulin dependent diab mell with peripheral angiopathy      | Probable T1 codes |
| 65616   | C108H00  | Insulin dependent diabetes mellitus with arthropathy        | Probable T1 codes |
| 62352   | C108H11  | Type I diabetes mellitus with arthropathy                   | Probable T1 codes |
| 39809   | C108J00  | Insulin dependent diab mell with neuropathic arthropathy    | Probable T1 codes |
| 60208   | C108J11  | Type I diabetes mellitus with neuropathic arthropathy       | Probable T1 codes |
| 18230   | C108J12  | Type 1 diabetes mellitus with neuropathic arthropathy       | Probable T1 codes |
| 46290   | C108y00  | Other specified diabetes mellitus with multiple comps       | Vague codes       |
| 64449   | C108z00  | Unspecified diabetes mellitus with multiple complications   | Vague codes       |
| 4513    | C109.00  | Non-insulin dependent diabetes mellitus                     | Probable T2 codes |
| 5884    | C109.11  | NIDDM - Non-insulin dependent diabetes mellitus             | Probable T2 codes |
| 17859   | C109.12  | Type 2 diabetes mellitus                                    | Probable T2 codes |
| 18219   | C109.13  | Type II diabetes mellitus                                   | Probable T2 codes |
| 52303   | C109000  | Non-insulin-dependent diabetes mellitus with renal comps    | Probable T2 codes |
| 50225   | C109011  | Type II diabetes mellitus with renal complications          | Probable T2 codes |
| 18209   | C109012  | Type 2 diabetes mellitus with renal complications           | Probable T2 codes |
| 50429   | C109100  | Non-insulin-dependent diabetes mellitus with ophthalm comps | Probable T2 codes |

| medcode | readcode | readterm                                                        | category          |
|---------|----------|-----------------------------------------------------------------|-------------------|
| 59725   | C109111  | Type II diabetes mellitus with ophthalmic complications         | Probable T2 codes |
| 70316   | C109112  | Type 2 diabetes mellitus with ophthalmic complications          | Probable T2 codes |
| 55842   | C109200  | Non-insulin-dependent diabetes mellitus with neuro<br>comps     | Probable T2 codes |
| 67905   | C109211  | Type II diabetes mellitus with neurological complications       | Probable T2 codes |
| 45919   | C109212  | Type 2 diabetes mellitus with neurological complications        | Probable T2 codes |
| 62146   | C109300  | Non-insulin-dependent diabetes mellitus with multiple<br>comps  | Probable T2 codes |
| 34912   | C109400  | Non-insulin dependent diabetes mellitus with ulcer              | Probable T2 codes |
| 55075   | C109411  | Type II diabetes mellitus with ulcer                            | Probable T2 codes |
| 65704   | C109412  | Type 2 diabetes mellitus with ulcer                             | Probable T2 codes |
| 40401   | C109500  | Non-insulin dependent diabetes mellitus with gangrene           | Probable T2 codes |
| 62107   | C109511  | Type II diabetes mellitus with gangrene                         | Probable T2 codes |
| 46150   | C109512  | Type 2 diabetes mellitus with gangrene                          | Probable T2 codes |
| 17262   | C109600  | Non-insulin-dependent diabetes mellitus with<br>retinopathy     | Probable T2 codes |
| 58604   | C109611  | Type II diabetes mellitus with retinopathy                      | Probable T2 codes |
| 42762   | C109612  | Type 2 diabetes mellitus with retinopathy                       | Probable T2 codes |
| 8403    | C109700  | Non-insulin dependant diabetes mellitus - poor control          | Probable T2 codes |
| 24458   | C109711  | Type II diabetes mellitus - poor control                        | Probable T2 codes |
| 45913   | C109712  | Type 2 diabetes mellitus - poor control                         | Probable T2 codes |
| 39406   | C109800  | Reaven's syndrome                                               | Not diabetes      |
| 29979   | C109900  | Non-insulin-dependent diabetes mellitus without<br>complication | Probable T2 codes |
| 72320   | C109A00  | Non-insulin dependent diabetes mellitus with<br>mononeuropathy  | Probable T2 codes |
| 50813   | C109A11  | Type II diabetes mellitus with mononeuropathy                   | Probable T2 codes |
| 45467   | C109B00  | Non-insulin dependent diabetes mellitus with<br>polyneuropathy  | Probable T2 codes |
| 47409   | C109B11  | Type II diabetes mellitus with polyneuropathy                   | Probable T2 codes |
| 59365   | C109C00  | Non-insulin dependent diabetes mellitus with<br>nephropathy     | Probable T2 codes |

| medcode | readcode | readterm                                                     | category                |
|---------|----------|--------------------------------------------------------------|-------------------------|
| 64571   | C109C11  | Type II diabetes mellitus with nephropathy                   | Probable T2 codes       |
| 24836   | C109C12  | Type 2 diabetes mellitus with nephropathy                    | Probable T2 codes       |
| 43785   | C109D00  | Non-insulin dependent diabetes mellitus with hypoglyca coma  | Probable T2 codes       |
| 56268   | C109D11  | Type II diabetes mellitus with hypoglycaemic coma            | Probable T2 codes       |
| 61071   | C109D12  | Type 2 diabetes mellitus with hypoglycaemic coma             | Probable T2 codes       |
| 69278   | C109E00  | Non-insulin depend diabetes mellitus with diabetic cataract  | Probable T2 codes       |
| 48192   | C109E11  | Type II diabetes mellitus with diabetic cataract             | Probable T2 codes       |
| 44779   | C109E12  | Type 2 diabetes mellitus with diabetic cataract              | Probable T2 codes       |
| 54212   | C109F00  | Non-insulin-dependent d m with peripheral angiopath          | Probable T2 codes       |
| 54899   | C109F11  | Type II diabetes mellitus with peripheral angiopathy         | Probable T2 codes       |
| 60699   | C109F12  | Type 2 diabetes mellitus with peripheral angiopathy          | Probable T2 codes       |
| 24693   | C109G00  | Non-insulin dependent diabetes mellitus with arthropathy     | Probable T2 codes       |
| 18143   | C109G11  | Type II diabetes mellitus with arthropathy                   | Probable T2 codes       |
| 49869   | C109G12  | Type 2 diabetes mellitus with arthropathy                    | Probable T2 codes       |
| 40962   | C109H00  | Non-insulin dependent d m with neuropathic arthropathy       | Probable T2 codes       |
| 47816   | C109H11  | Type II diabetes mellitus with neuropathic arthropathy       | Probable T2 codes       |
| 66965   | C109H12  | Type 2 diabetes mellitus with neuropathic arthropathy        | Probable T2 codes       |
| 18278   | C109J00  | Insulin treated Type 2 diabetes mellitus                     | Probable T2 codes       |
| 37648   | C109J11  | Insulin treated non-insulin dependent diabetes mellitus      | Probable T2 codes       |
| 18264   | C109J12  | Insulin treated Type II diabetes mellitus                    | Probable T2 codes       |
| 36633   | C109K00  | Hyperosmolar non-ketotic state in type 2 diabetes mellitus   | Probable T2 codes       |
| 52236   | C10A.00  | Malnutrition-related diabetes mellitus                       | Secondary / Other types |
| 66675   | C10A000  | Malnutrition-related diabetes mellitus with coma             | Secondary / Other types |
| 33969   | C10A100  | Malnutrition-related diabetes mellitus with ketoacidosis     | Secondary / Other types |
| 100347  | C10A500  | Malnutritn-relat diabetes melitus wth periph circul complctn | Secondary / Other types |
| 11551   | C10B.00  | Diabetes mellitus induced by steroids                        | Secondary / Other types |
| 26108   | C10B000  | Steroid induced diabetes mellitus without complication       | Secondary / Other types |

| medcode | readcode | readterm                                                    | category          |
|---------|----------|-------------------------------------------------------------|-------------------|
| 43453   | C10C.00  | Diabetes mellitus autosomal dominant                        | Genetic           |
| 46624   | C10C.11  | Maturity onset diabetes in youth                            | Genetic           |
| 98392   | C10C.12  | Maturity onset diabetes in youth type 1                     | Genetic           |
| 36695   | C10D.00  | Diabetes mellitus autosomal dominant type 2                 | Genetic           |
| 59991   | C10D.11  | Maturity onset diabetes in youth type 2                     | Genetic           |
| 1549    | C10E.00  | Type 1 diabetes mellitus                                    | Definite T1 codes |
| 12455   | C10E.11  | Type I diabetes mellitus                                    | Definite T1 codes |
| 51261   | C10E.12  | Insulin dependent diabetes mellitus                         | Definite T1 codes |
| 47582   | C10E000  | Type 1 diabetes mellitus with renal complications           | Definite T1 codes |
| 47649   | C10E100  | Type 1 diabetes mellitus with ophthalmic complications      | Definite T1 codes |
| 99311   | C10E111  | Type I diabetes mellitus with ophthalmic complications      | Definite T1 codes |
| 98071   | C10E112  | Insulin-dependent diabetes mellitus with ophthalmic comps   | Definite T1 codes |
| 42831   | C10E200  | Type 1 diabetes mellitus with neurological complications    | Definite T1 codes |
| 47650   | C10E300  | Type 1 diabetes mellitus with multiple complications        | Definite T1 codes |
| 91942   | C10E311  | Type I diabetes mellitus with multiple complications        | Definite T1 codes |
| 45276   | C10E312  | Insulin dependent diabetes mellitus with multiple complicat | Definite T1 codes |
| 43921   | C10E400  | Unstable type 1 diabetes mellitus                           | Definite T1 codes |
| 49949   | C10E411  | Unstable type I diabetes mellitus                           | Definite T1 codes |
| 54600   | C10E412  | Unstable insulin dependent diabetes mellitus                | Definite T1 codes |
| 18683   | C10E500  | Type 1 diabetes mellitus with ulcer                         | Definite T1 codes |
| 93878   | C10E511  | Type I diabetes mellitus with ulcer                         | Definite T1 codes |
| 98704   | C10E512  | Insulin dependent diabetes mellitus with ulcer              | Definite T1 codes |
| 69993   | C10E600  | Type 1 diabetes mellitus with gangrene                      | Definite T1 codes |
| 18387   | C10E700  | Type 1 diabetes mellitus with retinopathy                   | Definite T1 codes |
| 95343   | C10E711  | Type I diabetes mellitus with retinopathy                   | Definite T1 codes |
| 93875   | C10E712  | Insulin dependent diabetes mellitus with retinopathy        | Definite T1 codes |
| 35288   | C10E800  | Type 1 diabetes mellitus - poor control                     | Definite T1 codes |
| 72702   | C10E812  | Insulin dependent diabetes mellitus - poor control          | Definite T1 codes |
| 40682   | C10E900  | Type 1 diabetes mellitus maturity onset                     | Definite T1 codes |
| 96235   | C10E911  | Type I diabetes mellitus maturity onset                     | Definite T1 codes |

| medcode | readcode | readterm                                                    | category                |
|---------|----------|-------------------------------------------------------------|-------------------------|
| 97849   | C10E912  | Insulin dependent diabetes maturity onset                   | Definite T1 codes       |
| 69676   | C10EA00  | Type 1 diabetes mellitus without complication               | Definite T1 codes       |
| 62613   | C10EA11  | Type I diabetes mellitus without complication               | Definite T1 codes       |
| 99719   | C10EA12  | Insulin-dependent diabetes without complication             | Definite T1 codes       |
| 68105   | C10EB00  | Type 1 diabetes mellitus with mononeuropathy                | Definite T1 codes       |
| 46301   | C10EC00  | Type 1 diabetes mellitus with polyneuropathy                | Definite T1 codes       |
| 91943   | C10EC11  | Type I diabetes mellitus with polyneuropathy                | Definite T1 codes       |
| 101311  | C10EC12  | Insulin dependent diabetes mellitus with polyneuropathy     | Definite T1 codes       |
| 10418   | C10ED00  | Type 1 diabetes mellitus with nephropathy                   | Definite T1 codes       |
| 39070   | C10EE00  | Type 1 diabetes mellitus with hypoglycaemic coma            | Definite T1 codes       |
| 99716   | C10EE12  | Insulin dependent diabetes mellitus with hypoglycaemic coma | Definite T1 codes       |
| 49554   | C10EF00  | Type 1 diabetes mellitus with diabetic cataract             | Definite T1 codes       |
| 100770  | C10EF12  | Insulin dependent diabetes mellitus with diabetic cataract  | Definite T1 codes       |
| 93468   | C10EG00  | Type 1 diabetes mellitus with peripheral angiopathy         | Definite T1 codes       |
| 18642   | C10EH00  | Type 1 diabetes mellitus with arthropathy                   | Definite T1 codes       |
| 54008   | C10EJ00  | Type 1 diabetes mellitus with neuropathic arthropathy       | Definite T1 codes       |
| 30323   | C10EK00  | Type 1 diabetes mellitus with persistent proteinuria        | Definite T1 codes       |
| 30294   | C10EL00  | Type 1 diabetes mellitus with persistent microalbuminuria   | Definite T1 codes       |
| 10692   | C10EM00  | Type 1 diabetes mellitus with ketoacidosis                  | Definite T1 codes       |
| 62209   | C10EM11  | Type I diabetes mellitus with ketoacidosis                  | Definite T1 codes       |
| 40837   | C10EN00  | Type 1 diabetes mellitus with ketoacidotic coma             | Definite T1 codes       |
| 66145   | C10EN11  | Type I diabetes mellitus with ketoacidotic coma             | Definite T1 codes       |
| 22871   | C10EP00  | Type 1 diabetes mellitus with exudative maculopathy         | Definite T1 codes       |
| 97894   | C10EP11  | Type I diabetes mellitus with exudative maculopathy         | Definite T1 codes       |
| 55239   | C10EQ00  | Type 1 diabetes mellitus with gastroparesis                 | Definite T1 codes       |
| 95636   | C10ER00  | Latent autoimmune diabetes mellitus in adult                | Secondary / Other types |
| 758     | C10F.00  | Type 2 diabetes mellitus                                    | Definite T2 codes       |
| 22884   | C10F.11  | Type II diabetes mellitus                                   | Definite T2 codes       |
| 18777   | C10F000  | Type 2 diabetes mellitus with renal complications           | Definite T2 codes       |

| medcode | readcode | readterm                                                  | category          |
|---------|----------|-----------------------------------------------------------|-------------------|
| 57278   | C10F011  | Type II diabetes mellitus with renal complications        | Definite T2 codes |
| 47321   | C10F100  | Type 2 diabetes mellitus with ophthalmic complications    | Definite T2 codes |
| 100964  | C10F111  | Type II diabetes mellitus with ophthalmic complications   | Definite T2 codes |
| 34268   | C10F200  | Type 2 diabetes mellitus with neurological complications  | Definite T2 codes |
| 98616   | C10F211  | Type II diabetes mellitus with neurological complications | Definite T2 codes |
| 65267   | C10F300  | Type 2 diabetes mellitus with multiple complications      | Definite T2 codes |
| 43227   | C10F311  | Type II diabetes mellitus with multiple complications     | Definite T2 codes |
| 49074   | C10F400  | Type 2 diabetes mellitus with ulcer                       | Definite T2 codes |
| 91646   | C10F411  | Type II diabetes mellitus with ulcer                      | Definite T2 codes |
| 12736   | C10F500  | Type 2 diabetes mellitus with gangrene                    | Definite T2 codes |
| 18496   | C10F600  | Type 2 diabetes mellitus with retinopathy                 | Definite T2 codes |
| 49655   | C10F611  | Type II diabetes mellitus with retinopathy                | Definite T2 codes |
| 25627   | C10F700  | Type 2 diabetes mellitus - poor control                   | Definite T2 codes |
| 47315   | C10F711  | Type II diabetes mellitus - poor control                  | Definite T2 codes |
| 54773   | C10F800  | Reaven's syndrome                                         | Not diabetes      |
| 39481   | C10F811  | Metabolic syndrome X                                      | Not diabetes      |
| 47954   | C10F900  | Type 2 diabetes mellitus without complication             | Definite T2 codes |
| 53392   | C10F911  | Type II diabetes mellitus without complication            | Definite T2 codes |
| 62674   | C10FA00  | Type 2 diabetes mellitus with mononeuropathy              | Definite T2 codes |
| 95351   | C10FA11  | Type II diabetes mellitus with mononeuropathy             | Definite T2 codes |
| 18425   | C10FB00  | Type 2 diabetes mellitus with polyneuropathy              | Definite T2 codes |
| 50527   | C10FB11  | Type II diabetes mellitus with polyneuropathy             | Definite T2 codes |
| 12640   | C10FC00  | Type 2 diabetes mellitus with nephropathy                 | Definite T2 codes |
| 46917   | C10FD00  | Type 2 diabetes mellitus with hypoglycaemic coma          | Definite T2 codes |
| 98723   | C10FD11  | Type II diabetes mellitus with hypoglycaemic coma         | Definite T2 codes |
| 44982   | C10FE00  | Type 2 diabetes mellitus with diabetic cataract           | Definite T2 codes |
| 93727   | C10FE11  | Type II diabetes mellitus with diabetic cataract          | Definite T2 codes |
| 37806   | C10FF00  | Type 2 diabetes mellitus with peripheral angiopathy       | Definite T2 codes |
| 59253   | C10FG00  | Type 2 diabetes mellitus with arthropathy                 | Definite T2 codes |
| 35385   | C10FH00  | Type 2 diabetes mellitus with neuropathic arthropathy     | Definite T2 codes |
| 1407    | C10FJ00  | Insulin treated Type 2 diabetes mellitus                  | Definite T2 codes |
| 64668   | C10FJ11  | Insulin treated Type II diabetes mellitus                 | Definite T2 codes |



| medcode | readcode | readterm                                                     | category                |
|---------|----------|--------------------------------------------------------------|-------------------------|
| 34450   | C10FK00  | Hyperosmolar non-ketotic state in type 2 diabetes mellitus   | Definite T2 codes       |
| 26054   | C10FL00  | Type 2 diabetes mellitus with persistent proteinuria         | Definite T2 codes       |
| 60796   | C10FL11  | Type II diabetes mellitus with persistent proteinuria        | Definite T2 codes       |
| 18390   | C10FM00  | Type 2 diabetes mellitus with persistent microalbuminuria    | Definite T2 codes       |
| 85991   | C10FM11  | Type II diabetes mellitus with persistent microalbuminuria   | Definite T2 codes       |
| 32627   | C10FN00  | Type 2 diabetes mellitus with ketoacidosis                   | Definite T2 codes       |
| 51756   | C10FP00  | Type 2 diabetes mellitus with ketoacidotic coma              | Definite T2 codes       |
| 25591   | C10FQ00  | Type 2 diabetes mellitus with exudative maculopathy          | Definite T2 codes       |
| 63690   | C10FR00  | Type 2 diabetes mellitus with gastroparesis                  | Definite T2 codes       |
| 95539   | C10FS00  | Maternally inherited diabetes mellitus                       | Genetic                 |
| 51697   | C10G.00  | Secondary pancreatic diabetes mellitus                       | Secondary / Other types |
| 96506   | C10G000  | Secondary pancreatic diabetes mellitus without complication  | Secondary / Other types |
| 61122   | C10H.00  | Diabetes mellitus induced by non-steroid drugs               | Secondary / Other types |
| 67212   | C10H000  | DM induced by non-steroid drugs without complication         | Secondary / Other types |
| 68517   | C10J.00  | Insulin autoimmune syndrome                                  | Secondary / Other types |
| 37957   | C10K.00  | Type A insulin resistance                                    | Not diabetes            |
| 56885   | C10K000  | Type A insulin resistance without complication               | Not diabetes            |
| 43857   | C10M.00  | Lipoatrophic diabetes mellitus                               | Secondary / Other types |
| 22487   | C10N.00  | Secondary diabetes mellitus                                  | Secondary / Other types |
| 94383   | C10N000  | Secondary diabetes mellitus without complication             | Secondary / Other types |
| 93380   | C10N100  | Cystic fibrosis related diabetes mellitus                    | Secondary / Other types |
| 33343   | C10y.00  | Diabetes mellitus with other specified manifestation         | Vague codes             |
| 63371   | C10y100  | Diabetes mellitus, adult, + other specified manifestation    | Probable T2 codes       |
| 10098   | C10yy00  | Other specified diabetes mellitus with other spec comps      | Vague codes             |
| 70821   | C10yz00  | Diabetes mellitus NOS with other specified manifestation     | Vague codes             |
| 45491   | C10z.00  | Diabetes mellitus with unspecified complication              | Vague codes             |
| 68792   | C10z000  | Diabetes mellitus, juvenile type, + unspecified complication | Possible T1 codes       |

| medcode | readcode | readterm                                                    | category                      |
|---------|----------|-------------------------------------------------------------|-------------------------------|
| 63762   | C10z100  | Diabetes mellitus, adult onset, + unspecified complication  | Probable T2 codes             |
| 64283   | C10zy00  | Other specified diabetes mellitus with unspecified comps    | Vague codes                   |
| 64357   | C10zz00  | Diabetes mellitus NOS with unspecified complication         | Vague codes                   |
| 2472    | C110.00  | Hypoglycaemic coma                                          | Possible T1 codes             |
| 53630   | C110.11  | Insulin coma                                                | Possible T1 codes             |
| 61520   | C110000  | Iatrogenic hyperinsulinism                                  | Secondary / Other types       |
| 72882   | C110100  | Self-induced hyperinsulinism                                | Probable T1 codes             |
| 51371   | C110z00  | Hypoglycaemic coma NOS                                      | Possible T1 codes             |
| 1410    | C112.00  | Hypoglycaemia unspecified                                   | Possible T2 codes             |
| 4563    | C112000  | Reactive hypoglycaemia NOS                                  | Possible T2 codes             |
| 24405   | C112100  | Spontaneous hypoglycaemia NOS                               | Possible T2 codes             |
| 20368   | C112z00  | Hypoglycaemia unspecified NOS                               | Possible T2 codes             |
| 11359   | L180.00  | Diabetes mellitus during pregnancy/childbirth/puerperium    | Probable Gestational diabetes |
| 67635   | L180000  | Diabetes mellitus - unspec whether in pregnancy/puerperium  | Probable Gestational diabetes |
| 34639   | L180100  | Diabetes mellitus during pregnancy - baby delivered         | Probable Gestational diabetes |
| 49559   | L180300  | Diabetes mellitus during pregnancy - baby not yet delivered | Probable Gestational diabetes |
| 96823   | L180400  | Diabetes mellitus in puerperium - baby previously delivered | Probable T1 codes             |
| 50960   | L180500  | Pre-existing diabetes mellitus, insulin-dependent           | Probable T1 codes             |
| 50609   | L180600  | Pre-existing diabetes mellitus, non-insulin-dependent       | Probable T2 codes             |
| 10278   | L180800  | Diabetes mellitus arising in pregnancy                      | Probable Gestational diabetes |
| 8446    | L180811  | Gestational diabetes mellitus                               | Probable Gestational diabetes |
| 2664    | L180900  | Gestational diabetes mellitus                               | Probable Gestational diabetes |
| 55431   | L180X00  | Pre-existing diabetes mellitus, unspecified                 | Vague codes                   |
| 64384   | L180z00  | Diabetes mellitus in pregnancy/childbirth/puerperium NOS    | Probable Gestational diabetes |

Table 4. Read codes for Diabetic Retinopathy diagnosis and screening

| medcode | readcode | readterm                                                   | DR category |
|---------|----------|------------------------------------------------------------|-------------|
| 52041   | 2BBl.00  | O/E - left eye stable treated prolif diabetic retinopathy  | DR          |
| 52630   | 2BB0.00  | O/E - sight threatening diabetic retinopathy               | DR          |
| 19533   | 2BBY.00  | O/E - referable retinopathy                                | DR          |
| 3837    | F420400  | Diabetic maculopathy                                       | DR          |
| 47328   | 2BBk.00  | O/E - right eye stable treated prolif diabetic retinopathy | DR          |
| 101881  | 2BBr.00  | Impaired vision due to diabetic retinopathy                | DR          |
| 3914    | 2BB9.00  | O/E - retinal pigmentation                                 | DR          |
| 9339    | F421.00  | Other background retinopathy                               | DR          |
| 10882   | F421400  | Exudative retinopathy                                      | DR          |
| 48751   | 2BB3.00  | O/E - retinal A-V nipping                                  | DR          |
| 42762   | C109612  | Type 2 diabetes mellitus with retinopathy                  | DR          |
| 35659   | 2BB7.00  | O/E - retinal vascular prolif.                             | DR          |
| 38161   | C108711  | Type I diabetes mellitus with retinopathy                  | DR          |
| 72424   | 7270B00  | Vitrectomy using anterior approach                         | DR          |
| 9835    | 2BBL.00  | O/E - diabetic maculopathy present both eyes               | DR          |
| 39457   | F421C00  | Other intraretinal microvascular abnormality               | DR          |
| 55026   | 7270B11  | Anterior vitrectomy                                        | DR          |
| 11053   | F421800  | Retinal microaneurysms NOS                                 | DR          |
| 18387   | C10E700  | Type 1 diabetes mellitus with retinopathy                  | DR          |
| 4514    | 7270011  | Anterior vitrectomy                                        | DR          |
| 13102   | 2BBW.00  | O/E - right eye diabetic maculopathy                       | DR          |
| 13108   | 2BBX.00  | O/E - left eye diabetic maculopathy                        | DR          |
| 36119   | F421111  | Arteriosclerotic retinopathy                               | DR          |
| 93875   | C10E712  | Insulin dependent diabetes mellitus with retinopathy       | DR          |
| 8595    | F42y600  | Retinal exudate or deposit                                 | DR          |
| 102242  | 2BBs.00  | Retinal arteries silverwire                                | DR          |
| 17916   | F422011  | Retinopathy of prematurity                                 | DR          |
| 22871   | C10EP00  | Type 1 diabetes mellitus with exudative maculopathy        | DR          |
| 1411    | 3128100  | Fundoscopy abnormal                                        | DR          |
| 11626   | F420z00  | Diabetic retinopathy NOS                                   | DR          |
| 34455   | F421112  | Atheroscleritic retinopathy                                | DR          |
| 66964   | F426500  | Pseudoretinitis pigmentosa                                 | DR          |
| 2254    | F424100  | Central serous retinopathy                                 | DR          |
| 36867   | 2BBa.00  | O/E- non-referable retinopathy                             | DR          |
| 11129   | 2BBQ.00  | O/E - left eye background diabetic retinopathy             | DR          |
| 88368   | 7270411  | Vitrectomy using pars plana approach                       | DR          |
| 6509    | C108700  | Insulin dependent diabetes mellitus with retinopathy       | DR          |
| 45876   | F421200  | Renal retinopathy                                          | DR          |
| 8742    | 2BB5.00  | O/E - retinal haemorrhages                                 | DR          |
| 17262   | C109600  | Non-insulin-dependent diabetes mellitus with retinopathy   | DR          |
| 13107   | 2BBn.00  | O/E - left eye clinically significant macular oedema       | DR          |
| 104263  | F425900  | Maculopathy                                                | DR          |

|        |         |                                                       |           |
|--------|---------|-------------------------------------------------------|-----------|
| 58604  | C109611 | Type II diabetes mellitus with retinopathy            | DR        |
| 41049  | C108712 | Type 1 diabetes mellitus with retinopathy             | DR        |
| 1323   | F420.00 | Diabetic retinopathy                                  | DR        |
| 40982  | F421z00 | Other background retinopathy NOS                      | DR        |
| 50656  | 2BBc.00 | O/E - No retinal laser photocoagulation scars         | DR        |
| 36855  | 2BBG.00 | Retinal abnormality - non-diabetes                    | DR        |
| 3822   | 2BB8.00 | O/E - vitreous haemorrhages                           | DR        |
| 49655  | C10F611 | Type II diabetes mellitus with retinopathy            | DR        |
| 11433  | 2BBP.00 | O/E - right eye background diabetic retinopathy       | DR        |
| 17293  | 727..00 | Retina and other parts of eye operations              | DR        |
| 69662  | F421G00 | Venostasis retinopathy                                | DR        |
| 7069   | F420000 | Background diabetic retinopathy                       | DR        |
| 1438   | F421000 | Unspecified background retinopathy                    | DR        |
| 97894  | C10EP11 | Type I diabetes mellitus with exudative maculopathy   | DR        |
| 13106  | 2BB6.00 | O/E - retinal exudates                                | DR        |
| 22967  | 2BBF.00 | Retinal abnormality - diabetes related                | DR        |
| 25888  | 2BBm.00 | O/E - right eye clinically significant macular oedema | DR        |
| 25591  | C10FQ00 | Type 2 diabetes mellitus with exudative maculopathy   | DR        |
| 18496  | C10F600 | Type 2 diabetes mellitus with retinopathy             | DR        |
| 31829  | F433100 | Solar retinopathy                                     | DR        |
| 41229  | F421100 | Atherosclerotic retinopathy                           | DR        |
| 19532  | 2BB4.00 | O/E - retinal microaneurysms                          | DR        |
| 95343  | C10E711 | Type I diabetes mellitus with retinopathy             | DR        |
| 11858  | 7270400 | Pars plana vitrectomy                                 | DR        |
| 6702   | F421300 | Hypertensive retinopathy                              | DR        |
| 45145  | 2BB2.00 | O/E - retinal vessel narrowing                        | DR        |
| 2986   | F420200 | Preproliferative diabetic retinopathy                 | DR        |
| 13103  | 2BBS.00 | O/E - left eye preproliferative diabetic retinopathy  | DR        |
| 13099  | 2BBR.00 | O/E - right eye preproliferative diabetic retinopathy | DR        |
| 10755  | F420600 | Non proliferative diabetic retinopathy                | DR        |
| 65463  | F420800 | High risk non proliferative diabetic retinopathy      | DR        |
| 27022  | 5B42.00 | Laser therapy - retinal lesion                        | Severe DR |
| 86068  | 7272800 | Panretinal laser photocoagulation to lesion of retina | Severe DR |
| 13097  | 2BBT.00 | O/E - right eye proliferative diabetic retinopathy    | Severe DR |
| 100979 | 7272900 | Focal laser photocoagulation of retina                | Severe DR |
| 11874  | F422100 | Proliferative retinopathy due to sickle cell disease  | Severe DR |
| 96926  | FyuF700 | [X]Other proliferative retinopathy                    | Severe DR |
| 6836   | 7271100 | Laser photocoagulation of retina for detachment       | Severe DR |
| 11912  | 5B4..11 | Retinal laser therapy                                 | Severe DR |
| 30477  | F420700 | High risk proliferative diabetic retinopathy          | Severe DR |
| 9318   | 7272300 | Laser destruction of lesion of retina                 | Severe DR |
| 36035  | F422y00 | Other specified other proliferative retinopathy       | Severe DR |
| 18775  | 2BBO.00 | O/E - Laser photocoagulation scars                    | Severe DR |
| 10099  | F420300 | Advanced diabetic maculopathy                         | Severe DR |
| 46068  | 7272500 | Panretinal laser photocoagulation to lesion of retina | Severe DR |

|        |         | NEC                                                  |           |
|--------|---------|------------------------------------------------------|-----------|
| 13101  | 2BBV.00 | O/E - left eye proliferative diabetic retinopathy    | Severe DR |
| 38096  | F422z00 | Proliferative retinopathy NOS                        | Severe DR |
| 3286   | F420100 | Proliferative diabetic retinopathy                   | Severe DR |
| 7890   | F422.00 | Other proliferative retinopathy                      | Severe DR |
| 881    | 3128    | Fundoscopy                                           | Screening |
| 19535  | 2BBA.00 | Examination of retina                                | Screening |
| 10701  | 8HBD.00 | Retinopathy follow up                                | Screening |
| 25116  | 2BBZ.00 | O/E - retinal inspection NOS                         | Screening |
| 92317  | 2BBf.00 | O/E - left retina partially assessable               | Screening |
| 18311  | 68A7.00 | Diabetic retinopathy screening                       | Screening |
| 106269 | 9m0..00 | Diabetic retinopathy screening administrative status | Screening |
| 33681  | 2BB..00 | O/E - retinal inspection                             | Screening |
| 17871  | 312E.00 | Direct funduscopy following mydriatic                | Screening |
| 17198  | 2BB..11 | O/E - retina                                         | Screening |
| 19531  | 3128.11 | Retinoscopy                                          | Screening |
| 13196  | 66AD.00 | Fundoscopy - diabetic check                          | Screening |
| 36619  | 312F.00 | Camera funduscopy                                    | Screening |
| 19534  | 3128300 | Camera funduscopy                                    | Screening |
| 11891  | 68A8.00 | Digital retinal screening                            | Screening |
| 9974   | 9N1v.00 | Seen in diabetic eye clinic                          | Screening |
| 70163  | 2BBe.00 | O/E - right retina partially assessable              | Screening |
| 8140   | 9N2V.00 | Seen by optometrist                                  | Screening |
| 66273  | 2BBg.00 | O/E - right retina fully assessable                  | Screening |
| 61021  | 68AB.00 | Diabetic digital retinopathy screening offered       | Screening |
| 13105  | 58C1.00 | Retinal photography                                  | Screening |
| 13098  | 3128Z00 | Fundoscopy NOS                                       | Screening |
| 30111  | 3129    | Eye fundus photography                               | Screening |
| 20991  | 312A.00 | Slit lamp examination                                | Screening |
| 12528  | 9NNC.00 | Under care of retinal screener                       | Screening |
| 18662  | 8HBH.00 | Diabetic retinopathy 6 month review                  | Screening |
| 12636  | 9N2f.00 | Seen by retinal screener                             | Screening |
| 9934   | 9N2e.00 | Seen by ophthalmologist                              | Screening |
| 11018  | 8HBG.00 | Diabetic retinopathy 12 month review                 | Screening |
| 22966  | 3128400 | Indirect funduscopy following mydriatic              | Screening |
| 6108   | 9N2U.00 | Seen by optician                                     | Screening |
| 64070  | 312G.00 | Indirect funduscopy following mydriatic              | Screening |
| 95916  | 2BBh.00 | O/E - left retina fully assessable                   | Screening |

Table 5. Read codes for Ethnicity (Table reproduced from <http://www.clininf.eu/ethnicity.html>)

| Grouping of the 9S and 9i ethnic codes to the '16+1' format and the five category classifications |                             |                                                                                                                                                                                                                                                                                                                                                                                                                                                                                                                   |                                                                                                                          |
|---------------------------------------------------------------------------------------------------|-----------------------------|-------------------------------------------------------------------------------------------------------------------------------------------------------------------------------------------------------------------------------------------------------------------------------------------------------------------------------------------------------------------------------------------------------------------------------------------------------------------------------------------------------------------|--------------------------------------------------------------------------------------------------------------------------|
| Five category                                                                                     | 16 category framework       | 9i... Ethnic category hierarchy                                                                                                                                                                                                                                                                                                                                                                                                                                                                                   | 9S.. Ethnic group hierarchy                                                                                              |
| 1. White                                                                                          | 1. British or Mixed British | <b>9i0</b> British or mixed British                                                                                                                                                                                                                                                                                                                                                                                                                                                                               | <b>9S1</b> White, <b>9S10</b> White British, <b>9S14</b> Other white British ethnic grp                                  |
|                                                                                                   | 2. Irish                    | <b>9i1</b> Irish                                                                                                                                                                                                                                                                                                                                                                                                                                                                                                  | <b>9S11</b> White Irish, <b>9SA9</b> Irish NMO, <b>9SI</b> Irish traveller                                               |
|                                                                                                   | 3. Other White              | <b>9i2</b> Other White                                                                                                                                                                                                                                                                                                                                                                                                                                                                                            | <b>9S12</b> Other white ethnic group                                                                                     |
|                                                                                                   |                             | <b>9i20</b> English                                                                                                                                                                                                                                                                                                                                                                                                                                                                                               |                                                                                                                          |
|                                                                                                   |                             | <b>9i21</b> Scottish                                                                                                                                                                                                                                                                                                                                                                                                                                                                                              | <b>9S13</b> White Scottish                                                                                               |
|                                                                                                   |                             | <b>9i22</b> Welsh, <b>9i26</b> Cypriot part unsp, <b>9i27</b> Greek, <b>9i28</b> Greek Cypriot, <b>9i29</b> Turkish, <b>9i2A</b> Turkish Cypriot, <b>9i2B</b> Italian, <b>9i2C</b> Irish Traveller, <b>9i2D</b> Traveller, <b>9i2E</b> Gypsy/Romany, <b>9i2F</b> Polish, <b>9i2H</b> Commonwealth of (Russian), <b>9i2J</b> Kosovan, <b>9i2K</b> Albanian Serbian, <b>9i2P</b> Oth repub Yugoslav, <b>9i2R</b> Oth White/unsp/Mix Eur, <b>9i2S</b> Oth mixed White, <b>9i2T</b> Other White or White unspecified. |                                                                                                                          |
| 2. Mixed                                                                                          | 4. White + Black Caribbean  | <b>9i3</b> White & Black Caribbean                                                                                                                                                                                                                                                                                                                                                                                                                                                                                | <b>9SB5</b> Black Caribbean and White                                                                                    |
|                                                                                                   | 5. White + Black African    | <b>9i4</b> White and Black African                                                                                                                                                                                                                                                                                                                                                                                                                                                                                | <b>9SB6</b> Black African and White                                                                                      |
|                                                                                                   | 6. White + Asian            | <b>9i5</b> White & Asian                                                                                                                                                                                                                                                                                                                                                                                                                                                                                          | <b>9SB2</b> Other ethnic, Asian/White orig                                                                               |
|                                                                                                   | 7. Other mixed              | <b>9i6</b> Other Mixed                                                                                                                                                                                                                                                                                                                                                                                                                                                                                            | <b>9SB</b> Other ethnic, mixed origin, <b>9SB3</b> Other ethnic, mixed white orig, <b>9SB4</b> Other ethnic, other mixed |

|                           |                                        |                                                                                                                                             |                                                                                                                          |
|---------------------------|----------------------------------------|---------------------------------------------------------------------------------------------------------------------------------------------|--------------------------------------------------------------------------------------------------------------------------|
|                           |                                        |                                                                                                                                             | orig, <b>9S52</b> Other Black - Black/Asian orig.                                                                        |
|                           |                                        | <b>9i60</b> Black & Asian, <b>9i61</b> Black & Chinese                                                                                      |                                                                                                                          |
|                           |                                        | <b>9i62</b> Black and White                                                                                                                 | <b>9SB1</b> Other ethnic, Black/White orig, <b>9S51</b> Other Black – Black/White orig                                   |
|                           |                                        | <b>9i63</b> Chinese & White, <b>9i64</b> Asian & Chinese                                                                                    |                                                                                                                          |
| 3. Asian or Asian British | 8. Indian or British Indian            | <b>9i7</b> Indian/British Indians                                                                                                           | <b>9S6</b> Indian                                                                                                        |
|                           | 9. Pakistani or British Pakistani      | <b>9i8</b> Pakistani/Brit Pakists                                                                                                           | <b>9S7</b> Pakistani                                                                                                     |
|                           | 10. Bangladeshi or British Bangladeshi | <b>9i9</b> Bangladeshi/Brit Bangl                                                                                                           | <b>9S8</b> Bangladeshi                                                                                                   |
|                           | 11. Other Asian                        | <b>9iA</b> Other Asian                                                                                                                      | <b>9SH</b> Other Asian ethnic group, <b>9SA8</b> Other Asian NMO, <b>9SA7</b> Indian sub-continent NMO                   |
|                           |                                        | <b>9iA3</b> East African Asian                                                                                                              | <b>9SA6</b> E Afric Asian/Indo-Carib NMO                                                                                 |
|                           |                                        | <b>9iA4</b> Sri Lankan, <b>9iA5</b> Tamil, <b>9iA6</b> Sinhalese, <b>9iA7</b> Carib Asian, <b>9iA8</b> Briti Asian, <b>9iA9</b> Mixed Asian |                                                                                                                          |
| 4. Other Black            | 12. Caribbean                          | <b>9iB</b> Caribbean                                                                                                                        | <b>9S2</b> Black Caribbean                                                                                               |
|                           | 13. African                            | <b>9iC</b> African                                                                                                                          | <b>9S3</b> Black African, <b>9S44</b> Black - other African country, <b>9SA5</b> Other African countries NMO             |
|                           | 14 Other Black                         | <b>9iD</b> Other Black                                                                                                                      | <b>9S4</b> Black, other, non-mixed origin, <b>9S42</b> Black Caribbean/W.I./Guyana, <b>9S43</b> Black N African/Arab/Ira |

|                        |             |                                                                                                                                                                                                                                                                     |                                                                                                                                                                                                                                                               |
|------------------------|-------------|---------------------------------------------------------------------------------------------------------------------------------------------------------------------------------------------------------------------------------------------------------------------|---------------------------------------------------------------------------------------------------------------------------------------------------------------------------------------------------------------------------------------------------------------|
| 5. Other ethnic groups |             |                                                                                                                                                                                                                                                                     | nian,<br><b>9S45</b> Black E Afric Asia/Indo-Caribb,<br><b>9SG</b> Other black ethnic group, <b>9S47</b> Black - other Asian, <b>9S48</b> Black Black - other, <b>9S5</b> Black - other, mixed, <b>9SA3</b> Caribbean I./W.I./Guyana NMO                      |
|                        |             | <b>9iD0</b> Somali, <b>9iD1</b> Nigerian                                                                                                                                                                                                                            |                                                                                                                                                                                                                                                               |
|                        |             | <b>9iD2</b> Black British                                                                                                                                                                                                                                           | <b>9S41</b> Black British                                                                                                                                                                                                                                     |
|                        | 15. Chinese | <b>9iE</b> Chinese                                                                                                                                                                                                                                                  | <b>9S9</b> Chinese                                                                                                                                                                                                                                            |
|                        | 16. Other   | <b>9iF</b> Other                                                                                                                                                                                                                                                    | <b>9SJ</b> Other ethnic group, <b>9SA</b> Other ethnic non-mixed NMO, <b>9SA2</b> Brit. ethnic minor. unsp NMO, <b>9SAA</b> Greek/Greek Cypriot NMO, <b>9SAB</b> Turkish/Turkish Cypriot NMO <b>9SAC</b> Other European NMO, <b>9SAD</b> Other ethnic NEC NMO |
|                        |             | <b>9iF0</b> Vietnamese                                                                                                                                                                                                                                              | <b>9SC</b> Vietnamese                                                                                                                                                                                                                                         |
|                        |             | <b>9iF1</b> Japanese, <b>9iF2</b> Filipino, <b>9iF3</b> Malaysian, <b>9iF9</b> Arab                                                                                                                                                                                 |                                                                                                                                                                                                                                                               |
|                        |             | <b>9iFA</b> North African                                                                                                                                                                                                                                           | <b>9SA4</b> N African Arab/Iranian NMO                                                                                                                                                                                                                        |
|                        |             | <b>9iFB</b> ME ex Isr/Iran/Arab, <b>9iFD</b> Iranian, <b>9iFE</b> Kurdish, <b>9iFG</b> Latin American, <b>9iFH</b> South/Central American, <b>9iFJ</b> Multi-ethnic islands: Mauritian or Seychellois or Maldivian or St Helena, <b>9iFK</b> Any other - ethn categ |                                                                                                                                                                                                                                                               |



|               |            |                                |                                                                                                                                                      |
|---------------|------------|--------------------------------|------------------------------------------------------------------------------------------------------------------------------------------------------|
| 6. Not stated | 17. (16+1) | <b>9iG</b> Ethn cat not stated | <b>9S</b> Ethnic groups census, <b>9SD</b> Ethnic group - patient refused, <b>9SE</b> Ethnic group not recorded, <b>9SZ</b> Ethnic groups census NOS |
|               | Not stated |                                |                                                                                                                                                      |

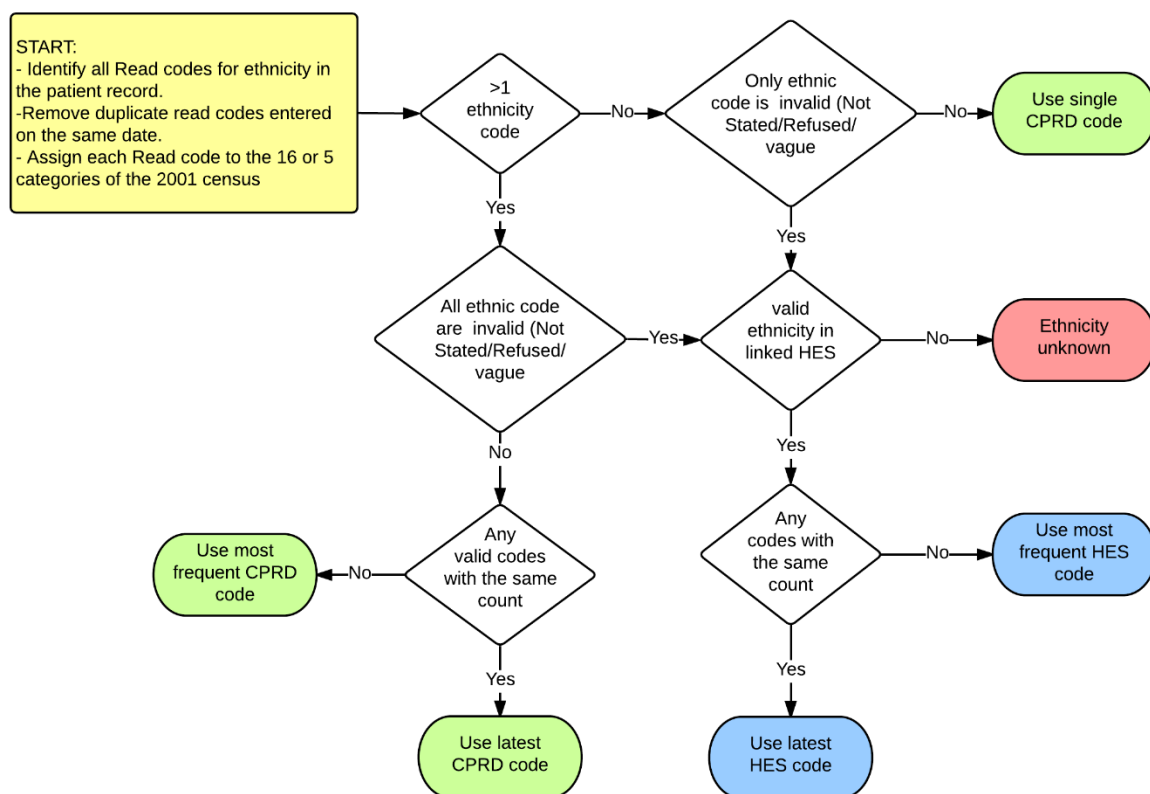

Figure 6. Classification of Ethnicity in the CPRD (From Mathur et al. Journal of Public Health, 2013)
